# Supplementary material for: Rho-Associated Kinase Activity Is an Independent Predictor of Cardiovascular Events in Acute Coronary Syndrome
Source: PubMed Central journal article supplement — Hypertension. Author manuscript; Available in PMC 2016 Aug 18. (PMC4989242; doi:10.1161/hypertensionaha.115.05587), 2015-08-17
Supplement: NIHMS796379-supplement-Supp.pdf [file NIHMS796379-supplement-Supp.pdf]

**Online Supplement****Rho-associated Kinases Activity Is an Independent Predictor of Cardiovascular Events in Acute Coronary Syndrome**

Brief title: Rho kinase and acute coronary syndrome

Masato Kajikawa, MD;<sup>1</sup> Kensuke Noma, MD, PhD;<sup>2,3</sup> Ayumu Nakashima, MD, PhD;<sup>2</sup>  
Tatsuya Maruhashi, MD;<sup>1</sup> Yumiko Iwamoto, MD;<sup>1</sup> Takeshi Matsumoto, MD;<sup>1</sup> Akimichi  
Iwamoto, MD;<sup>1</sup> Nozomu Oda, MD;<sup>1</sup> Takayuki Hidaka, MD, PhD;<sup>1</sup> Yasuki Kihara, MD,  
PhD;<sup>1</sup> Yoshiki Aibara, MS; Kazuaki Chayama, MD, PhD;<sup>4</sup> Shota Sasaki, MD, PhD;<sup>5</sup>  
Masaya Kato, MD, PhD;<sup>5</sup> Keigo Dote, MD, PhD;<sup>5</sup> Chikara Goto, PhD;<sup>6</sup>  
James K. Liao, MD;<sup>7</sup> Yukihiro Higashi, MD, PhD, FAHA<sup>2,3</sup>

<sup>1</sup>Department of Cardiovascular Medicine, Graduate School of Biomedical Sciences,  
Hiroshima University, Hiroshima, Japan

<sup>2</sup>Division of Regeneration and Medicine, Medical Center for Translational and Clinical  
Research, Hiroshima University Hospital, Hiroshima, Japan

<sup>3</sup>Department of Cardiovascular Regeneration and Medicine, Research Institute for  
Radiation Biology and Medicine, Hiroshima University, Hiroshima, Japan

<sup>4</sup>Department of Gastroenterology and Metabolism, Institute of Biomedical and Health  
Sciences, Graduate School of Biomedical and Health Sciences, Hiroshima University,  
Hiroshima, Japan

<sup>5</sup>Department of Cardiology, Hiroshima City Asa Hospital

<sup>6</sup>Hiroshima International University, Hiroshima, Japan

<sup>7</sup>University of Chicago Medical Center, Chicago, IL, USA

Address for correspondence:

Yukihiro Higashi, MD, PhD, FAHA

Department of Cardiovascular Regeneration and Medicine,  
Research Institute for Radiation Biology and Medicine, Hiroshima University

1-2-3 Kasumi, Minami-ku, Hiroshima 734-8551, Japan

Phone: +81-82-257-5831 Fax: +81-82-257-5831

E-mail: [yhigashi@hiroshima-u.ac.jp](mailto:yhigashi@hiroshima-u.ac.jp)

---

## Supplemental Methods

### **Rho-associated kinase (ROCK) activity and Cardiovascular Events during the Follow-up Period**

ROCK activity and serum concentrations of total cholesterol, high-density lipoprotein cholesterol, low-density lipoprotein cholesterol, triglycerides, blood urea nitrogen, creatinine, glucose, and electrolytes were measured at the following time points: within 2 hours of acute coronary syndrome (ACS) onset and at 3 and 24 hours after, at 7 days and 14 days after and 6 months after ACS onset. Measurement of the serum creatine kinase levels was performed at admission and at every 3 hours after reperfusion until a peak level. Echocardiographic parameters were evaluated at 7 days after ACS onset.

We obtained information on potential outcomes or adverse events from medical records and/or telephone survey to their primary care doctors. We first assessed the associations of ROCK activity with first major cardiovascular events (death from cardiovascular causes, acute myocardial infarction, ischemic stroke and coronary revascularization) and then assessed the associations with death from cardiovascular causes, acute myocardial infarction, ischemic stroke, coronary revascularization, and hospitalization for heart failure. Coronary revascularization was defined as unplanned percutaneous coronary intervention (PCI) or coronary artery bypass graft surgery, resulting from myocardial ischemia after PCI in ACS. Indications of revascularization and hospitalization for heart failure were determined by cardiology specialists who were blind to the protocol of this study.

### **Measurement of ROCK Activity**

ROCK activity was assayed in peripheral blood leukocytes as the amount of phospho-Thr853 in the myosin-binding subunit of myosin light chain phosphatase (MLCPh), because myosin-binding subunit on MLCPh is one of the downstream targets of ROCK. Blood was collected at room temperature in heparinized tubes (20 U/mL). After adding an equal volume of 2% dextran, each sample was kept at room temperature for 30 minutes. The supernatant was spun at 1450 rpm for 10 minutes. Red blood cells in the resulting cell pellet were lysed with the addition of water and spun at 1450 rpm for 10 minutes after the addition of Hank's balanced salt solution (Hyclone, Logan, UT, USA). The resulting leukocyte pellet was resuspended in medium 199 (Sigma Chemical Co., Saint Louis, Missouri, USA) and the number of cells was counted using a

---

hematocytometer. Cells were fixed in 10% trichloroacetic acid and 10 mmol/L dichlorodiphenyltrichloroethane. After centrifugation, the cell pellets were stored at -80°C for Western blot analysis. Cells pellets were dissolved in 10 µL of 1 mol/L Tris base and then mixed with 100 µL of extraction buffer (8 mol/L urea, 2% sodium dodecyl sulfate, 5% sucrose, and 5% 2-mercaptoethanol). Equal amounts of cell extracts were subjected to 7.5% sodium dodecyl sulfate-polyacrylamide gel electrophoresis and transferred to nitrocellulose membranes. NIH 3T3 cell lysates were used as a positive control and to standardize the results of Western blot analyses from several membranes. After serum starvation for 20 hours, confluent cells were stimulated with 10 µmol/L lysophosphatidic acid for 10 minutes and then subsequently fixed and harvested in 10% trichloroacetic acid and 10 mmol/L dichlorodiphenyltrichloroethane. Following centrifugation at 1450 rpm for 10 minutes at 4°C, precipitates were dissolved in 10 µL of 1 mol/L Tris base and mixed with 100 µL of extraction buffer. An equal volume of positive control cell lysate was used for each gel. Membranes were incubated with rabbit anti-phospho-specific Thr853-myosin-binding subunit polyclonal antibody (Biosource Invitrogen, Carlsbad, California, USA), rabbit anti-myosin-binding subunit polyclonal antibody (Covance Laboratories, Evansville, Indiana, USA), or antiactin monoclonal antibody (Sigma). Bands were visualized using the ECL system (Amersham-Pharmacia Co., London, UK). Images were captured using Adobe Photoshop, and the band intensities were quantified using National Institutes of Health Image 1.61. Rho-associated kinase activity was expressed as the ratio of phospho myosin-binding subunit in each sample to phospho myosin-binding subunit in each positive control divided by total myosin-binding subunit in each sample per total myosin-binding subunit in each positive control.

---

## Supplemental Tables

**Table S1.** Baseline Clinical Characteristics of ACS Patients on the Basis of Maximum Rho-associated Kinase Activity

| Variable                                     | Low group<br>(n=37) | High group<br>(n=36) | P value |
|----------------------------------------------|---------------------|----------------------|---------|
| Age, yr                                      | 67±11               | 66±11                | 0.63    |
| Gender, men/women                            | 29/8                | 31/5                 | 0.38    |
| Body mass index, kg/m <sup>2</sup>           | 24.0±3.7            | 23.7±2.3             | 0.71    |
| Systolic blood pressure, mmHg                | 145±25              | 143±32               | 0.85    |
| Diastolic blood pressure, mmHg               | 79±16               | 81±20                | 0.64    |
| Heart rate, bpm                              | 78±20               | 78±19                | 0.89    |
| Medical history, n (%)                       |                     |                      |         |
| Hypertension                                 | 26 (70.3)           | 29 (80.6)            | 0.30    |
| Dyslipidemia                                 | 29 (78.4)           | 23 (63.9)            | 0.17    |
| Diabetes mellitus                            | 12 (32.4)           | 17 (47.2)            | 0.19    |
| Smokers                                      | 28 (75.7)           | 29 (80.6)            | 0.61    |
| Previous coronary artery disease             | 1 (2.7)             | 1 (2.8)              | 0.98    |
| Previous stroke                              | 3 (8.1)             | 4 (11.1)             | 0.66    |
| Laboratory determinations                    |                     |                      |         |
| Total cholesterol, mmol/L                    | 5.38±1.16           | 5.35±0.93            | 0.44    |
| Triglycerides, mmol/L                        | 1.68±0.87           | 1.47±0.84            | 0.28    |
| High-density lipoprotein cholesterol, mmol/L | 1.33±0.40           | 1.32±0.32            | 0.88    |
| Low-density lipoprotein cholesterol, mmol/L  | 3.44±0.96           | 3.49±0.83            | 0.78    |
| Glucose, mmol/L                              | 8.60±2.94           | 9.94±3.94            | 0.12    |
| Maximum creatine kinase, IU/L                | 1661±1848           | 3035±2842            | 0.02    |
| Brain natriuretic peptide, pg/mL             | 191±464             | 142±285              | 0.61    |
| Medications, n (%)                           |                     |                      |         |
| Antiplatelets                                | 6 (16.2)            | 3 (8.33)             | 0.30    |
| Calcium-channel blockers                     | 16 (43.2)           | 13 (36.1)            | 0.53    |
| Renin angiotensin system inhibitors          | 16 (43.2)           | 13 (36.1)            | 0.53    |
| Statins                                      | 10 (27.0)           | 3 (8.3)              | 0.03    |
| Medically treated diabetes                   |                     |                      |         |

|                                              |                |                |      |
|----------------------------------------------|----------------|----------------|------|
| Any                                          | 7 (18.9)       | 10 (27.8)      | 0.37 |
| Insulin-dependent                            | 1 (2.7)        | 1 (2.8)        | 0.98 |
| Culprit vessel (LAD/LCx/RCA), (%)            | 37.8/24.3/37.8 | 39.7/19.2/41.1 | 0.31 |
| Implantation of stent, n (%)                 |                |                |      |
| Any type                                     | 32 (86.4)      | 34 (94.4)      | 0.24 |
| Drug-eluting                                 | 5 (13.5)       | 6 (16.7)       | 0.70 |
| Echocardiographic parameters                 |                |                |      |
| Left atrial diameter, mm                     | 36.3±4.8       | 37.7±5.8       | 0.27 |
| Left ventricular end-diastolic dimension, mm | 45.9±5.0       | 47.5±5.4       | 0.19 |
| Left ventricular ejection fraction, %        | 54.0±9.6       | 51.8±7.8       | 0.29 |

All results are presented as means±SD.

Low group indicates maximum Rho-associated kinase activity of <1.14, and high indicates maximum Rho-associated kinase activity ≥1.14.

ACS indicates acute coronary syndrome; bpm, beats per minute; LAD, left anterior descending artery; LCx, left circumflex artery; RCA, right coronary artery.

**Table S2.** Cause of Death

| Cause of death                 | Low group<br>(n=37) | High group<br>(n=36) |
|--------------------------------|---------------------|----------------------|
| Sudden death, n                | 1                   | 0                    |
| Acute myocardial infarction, n | 0                   | 1                    |
| Ischemic stroke, n             | 1                   | 0                    |
| Heart failure, n               | 0                   | 1                    |
| Cancer, n                      | 1                   | 0                    |

Low group indicates maximum Rho-associated kinase activity of  $<1.14$ , and high group indicates  $\geq 1.14$ .

**Table S3.** Baseline Clinical Characteristics of the ACS Patients on the Basis of Peak Creatine Kinase Level

| Variable                                     | Low group      | High group     | P value |
|----------------------------------------------|----------------|----------------|---------|
| Age, yr                                      | 68±11          | 64±11          | 0.15    |
| Gender, men/women                            | 24/10          | 31/3           | 0.02    |
| Body mass index, kg/m <sup>2</sup>           | 23.7±3.4       | 24.1±2.9       | 0.65    |
| Systolic blood pressure, mmHg                | 142±25         | 144±32         | 0.75    |
| Diastolic blood pressure, mmHg               | 78±18          | 81±18          | 0.57    |
| Heart rate, bpm                              | 79±20          | 79±18          | 0.95    |
| Medical history, n (%)                       |                |                |         |
| Hypertension                                 | 28 (82.4)      | 24 (70.6)      | 0.25    |
| Dyslipidemia                                 | 24 (70.6)      | 26 (76.5)      | 0.17    |
| Diabetes mellitus                            | 11 (32.4)      | 17 (50.0)      | 0.13    |
| Smokers                                      | 23 (67.7)      | 29 (85.3)      | 0.08    |
| Previous coronary artery disease             | 1 (2.9)        | 0 (0)          | 0.23    |
| Previous stroke                              | 2 (5.9)        | 3 (8.8)        | 0.64    |
| Laboratory determinations                    |                |                |         |
| Total cholesterol, mmol/L                    | 5.22±1.11      | 5.48±1.03      | 0.32    |
| Triglycerides, mmol/L                        | 1.58±0.84      | 1.60±0.90      | 0.93    |
| High-density lipoprotein cholesterol, mmol/L | 1.32±0.34      | 1.32±0.39      | 0.98    |
| Low-density lipoprotein cholesterol, mmol/L  | 3.34±0.96      | 3.57±0.88      | 0.29    |
| Glucose, mmol/L                              | 8.88±3.39      | 9.99±3.77      | 0.22    |
| Maximum creatine kinase, IU/L                | 602±443        | 4013±2447      | <0.001  |
| Brain natriuretic peptide, pg/mL             | 212±487        | 132±280        | 0.43    |
| Medications, n (%)                           |                |                |         |
| Antiplatelets                                | 6 (17.7)       | 2 (5.8)        | 0.12    |
| Calcium-channel blockers                     | 18 (52.9)      | 11 (32.4)      | 0.08    |
| Renin angiotensin system inhibitors          | 16 (47.1)      | 13 (38.2)      | 0.46    |
| Statins                                      | 7 (20.6)       | 6 (17.7)       | 0.75    |
| Medically treated diabetes                   |                |                |         |
| Any                                          | 6 (17.7)       | 10 (29.4)      | 0.25    |
| Insulin-dependent                            | 1 (2.9)        | 1 (2.9)        | -       |
| Culprit vessel (LAD/LCx/RCA), (%)            | 38.2/14.7/47.1 | 41.2/23.5/35.3 | 0.34    |

---

|                              |           |           |      |
|------------------------------|-----------|-----------|------|
| Implantation of stent, n (%) |           |           |      |
| Any type                     | 29 (85.3) | 32 (94.1) | 0.22 |
| Drug-eluting                 | 6 (17.7)  | 4 (14.7)  | 0.49 |

---

All results are presented as means±SD.

Low group indicates peak creatine kinase level of <1474 and high indicates peak creatine kinase level of ≥1474.

ACS indicates acute coronary syndrome; bpm, beats per minute; LAD, left anterior descending artery;

LCx, left circumflex artery; RCA, right coronary artery.

---



**Table S4.** Association Between Maximum Rho-associated Kinase Activity and Events during Follow-up

| Variable                          | Unadjusted                | Adjusted*                  | Adjusted†                  | Adjusted‡                 | Adjusted§                   |
|-----------------------------------|---------------------------|----------------------------|----------------------------|---------------------------|-----------------------------|
|                                   | HR (95% CI)               | HR (95% CI)                | HR (95% CI)                | HR (95% CI)               | HR (95% CI)                 |
|                                   | P value                   | P value                    | P value                    | P value                   | P value                     |
| First major cardiovascular event  | 3.39 (1.61-7.80)<br>0.001 | 4.05 (1.87-9.50)<br><0.001 | 3.94 (1.79-9.44)<br><0.001 | 3.52 (1.46-8.98)<br>0.005 | 4.56 (1.98-11.34)<br><0.001 |
| Death from cardiovascular disease | 1.05 (0.13-8.76)<br>0.96  | 1.10 (0.13-9.36)<br>0.92   | 1.00 (0.12-8.83)<br>0.99   | 3.47 (0.25-89.29)<br>0.36 | 1.39 (0.14-16.76)<br>0.77   |
| Acute myocardial infarction       | 0.35 (0.02-2.70)<br>0.32  | 0.30 (0.01-2.36)<br>0.26   | 0.28 (0.01-2.25)<br>0.24   | 0.40 (0.02-3.56)<br>0.43  | 0.20 (0.01-1.64)<br>0.14    |
| Ischemic stroke                   | 2.23 (0.21-48.00)<br>0.50 | 2.49 (0.23-55.15)<br>0.45  | 2.95 (0.23-82.55)<br>0.41  | 1.99 (0.05-109.3)<br>0.69 | 1.80 (0.12-56.02)<br>0.68   |
| Coronary revascularization        | 3.03 (1.42-7.03)<br>0.004 | 3.61 (1.65-8.56)<br>0.001  | 3.39 (1.53-8.16)<br>0.002  | 2.90 (1.19-7.43)<br>0.02  | 3.79 (1.63-9.49)<br>0.002   |
| Hospitalization for heart failure | 3.22 (0.41-65.07)<br>0.27 | 3.96 (0.50-80.78)<br>0.20  | 2.06 (0.20-46.39)<br>0.55  | 1.35 (0.10-39.38)<br>0.83 | 1.55 (0.17-34.15)<br>0.71   |
| Death from any cause              | 0.70 (0.09-4.21)<br>0.69  | 0.73 (0.09-4.47)<br>0.72   | 0.63 (0.08-3.97)<br>0.61   | 0.22 (0.01-2.23)<br>0.21  | 0.68 (0.08-5.29)<br>0.70    |

First major cardiovascular events include cardiovascular death, acute myocardial infarction, ischemic stroke, and coronary revascularization.

HR indicates hazard ratio; CI, confidence interval; NA, not applicable.

Hazard ratios are for the high maximum Rho-associated kinase activity group using the low maximum Rho-associated kinase activity group as a reference.

\*Adjusted for age and gender.

†Adjusted for age; gender, presence of hypertension, dyslipidemia, diabetes, and smoking.

‡Adjusted for age; gender, presence of hypertension, dyslipidemia, diabetes, smoking, and maximum creatine kinase value.

§Adjusted for age; gender, presence of hypertension, dyslipidemia, diabetes, smoking, and concomitant treatment with statins.

---

**Table S5.** Baseline Clinical Characteristics of ACS Patients on the Basis of Rho-associated Kinase Activity Evaluated at 6 Months after ACS Onset

| Variable                                     | Low group<br>(n=34) | High group<br>(n=33) | P value |
|----------------------------------------------|---------------------|----------------------|---------|
| Age, yr                                      | 65±10               | 66±12                | 0.72    |
| Gender, men/women                            | 27/7                | 27/6                 | 0.80    |
| Body mass index, kg/m <sup>2</sup>           | 23.9±3.4            | 24.4±2.4             | 0.60    |
| Systolic blood pressure, mmHg                | 127±22              | 122±19               | 0.36    |
| Diastolic blood pressure, mmHg               | 72±14               | 74±13                | 0.63    |
| Heart rate, bpm                              | 69±11               | 69±8                 | 0.82    |
| Medical history, n (%)                       |                     |                      |         |
| Hypertension                                 | 27 (79.4)           | 23 (69.7)            | 0.36    |
| Dyslipidemia                                 | 24 (70.6)           | 25 (75.8)            | 0.63    |
| Diabetes mellitus                            | 16 (47.1)           | 10 (30.3)            | 0.16    |
| Smokers                                      | 28 (82.4)           | 24 (72.7)            | 0.34    |
| Laboratory determinations                    |                     |                      |         |
| Total cholesterol, mmol/L                    | 4.60±0.70           | 4.78±0.70            | 0.34    |
| Triglycerides, mmol/L                        | 1.81±0.72           | 1.68±0.84            | 0.55    |
| High-density lipoprotein cholesterol, mmol/L | 1.32±0.31           | 1.37±0.28            | 0.38    |
| Low-density lipoprotein cholesterol, mmol/L  | 2.77±0.59           | 2.95±0.62            | 0.23    |
| HbA1c, %                                     | 6.4±1.0             | 6.2±0.8              | 0.48    |
| Brain natriuretic peptide, pg/mL             | 89±213              | 74±111               | 0.73    |
| Medications, n (%)                           |                     |                      |         |
| Antiplatelets                                | 34 (100)            | 34 (100)             | NA      |
| Calcium-channel blockers                     | 15 (44.1)           | 12 (36.4)            | 0.51    |
| Renin angiotensin system inhibitors          | 27 (79.4)           | 24 (72.7)            | 0.52    |
| Statins                                      | 19 (55.9)           | 21 (63.6)            | 0.52    |
| Medically treated diabetes                   |                     |                      |         |
| Any                                          | 8 (23.5)            | 4 (12.1)             | 0.22    |
| Insulin-dependent                            | 3 (8.8)             | 1 (3.0)              | 0.91    |
| Culprit vessel (LAD/LCx/RCA), (%)            | 41.2/20.6/38.2      | 36.4/21.2/42.4       | 0.65    |
| Implantation of stent, n (%)                 |                     |                      |         |
| Any type                                     | 30 (88.2)           | 30 (90.9)            | 0.72    |

---

|              |          |          |      |
|--------------|----------|----------|------|
| Drug-eluting | 5 (14.7) | 5 (15.2) | 0.96 |
|--------------|----------|----------|------|

---

All results are presented as means±SD.

Low group indicates maximum Rho-associated kinase activity of  $\leq 0.70$ , and high indicates maximum Rho-associated kinase activity  $> 0.70$ .

ACS indicates acute coronary syndrome; bpm, beats per minute; NA, not applicable; LAD, left anterior descending artery; LCx, left circumflex artery; RCA, right coronary artery.

## Supplemental Figures

## Figure S1

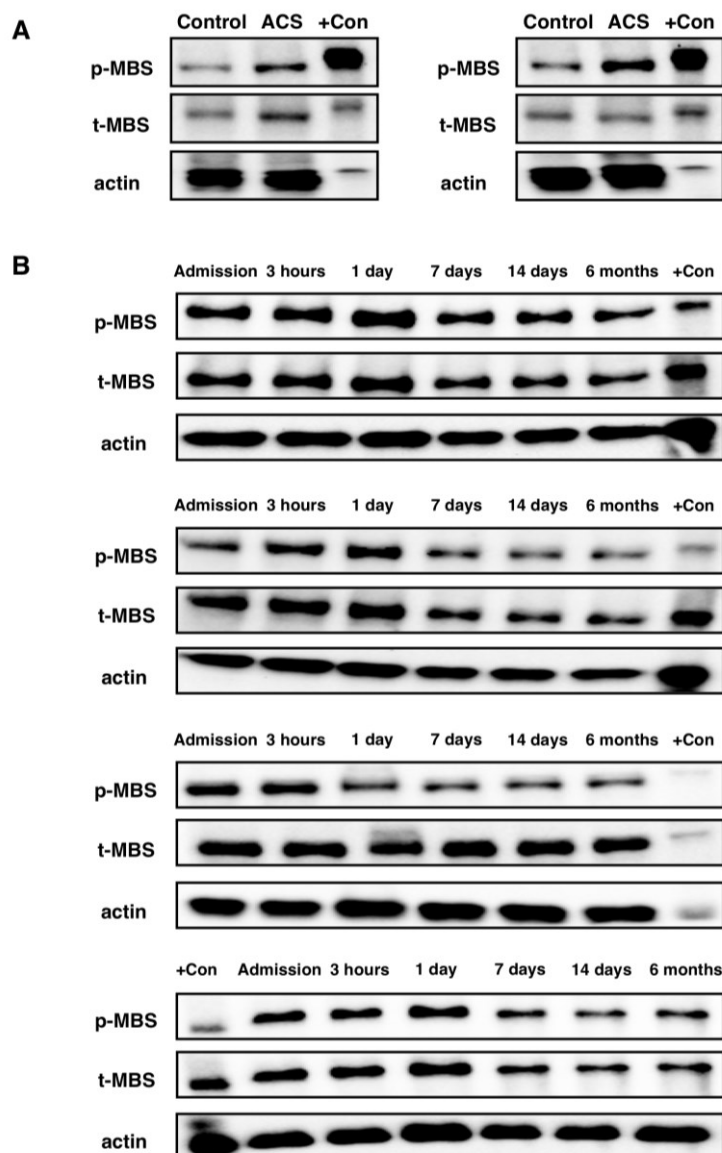

**Figure S1 A.** Western blot analysis for phospho myosin-binding subunit (p-MBS), total myosin-binding subunit (t-MBS), and actin in peripheral blood leukocytes in 2 control patients and 2 patients with acute coronary syndrome (ACS). **B.** Western blot analysis for phospho myosin-binding subunit (p-MBS), total myosin-binding subunit (t-MBS), and actin in peripheral blood leukocytes within 2 hours of acute coronary syndrome (ACS) onset (admission) and at 3 hours, 1 day, 7 days, 14 days, and 6 months after ACS onset in 4 patients with ACS.

Figure S2

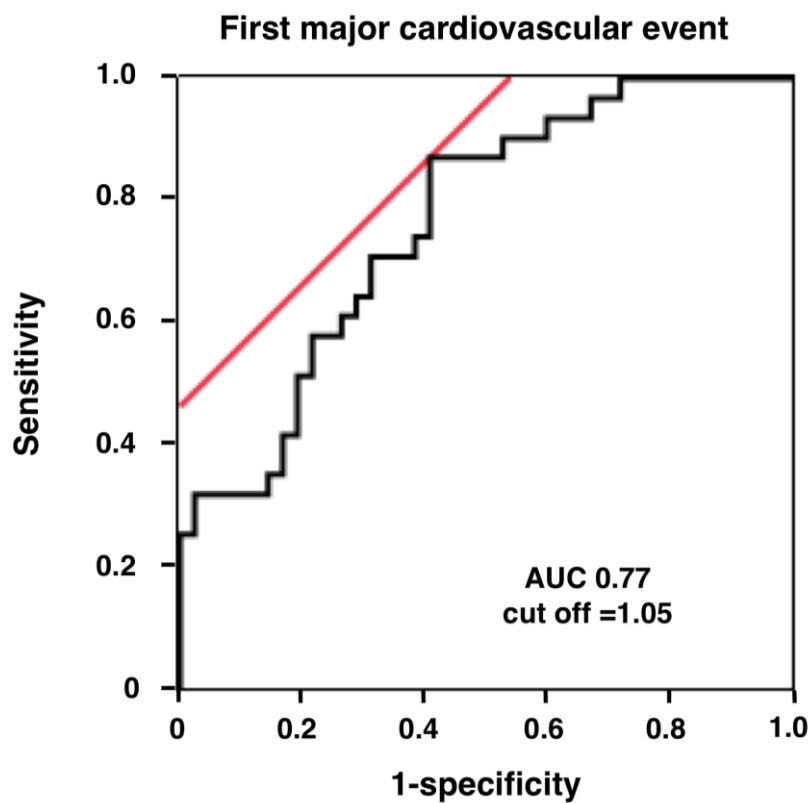

**Figure S2.** Receiver operating characteristic curves of maximum Rho-associated kinase activity in acute coronary syndrome patients for predicting first major cardiovascular events. AUC indicates area under curve.

Figure S3

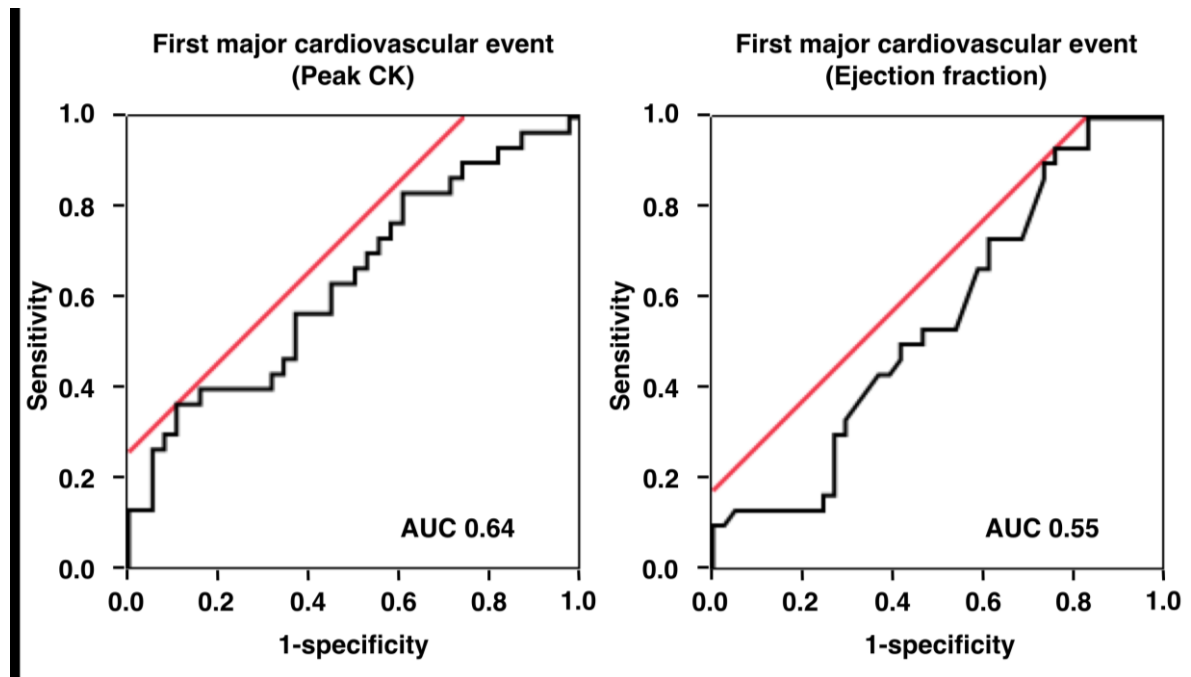

**Figure S3.** Receiver operating characteristic curves of maximum creatine kinase (CK) and ejection fraction in acute coronary syndrome patients for predicting first major cardiovascular events. AUC indicates area under curve.

Figure S4

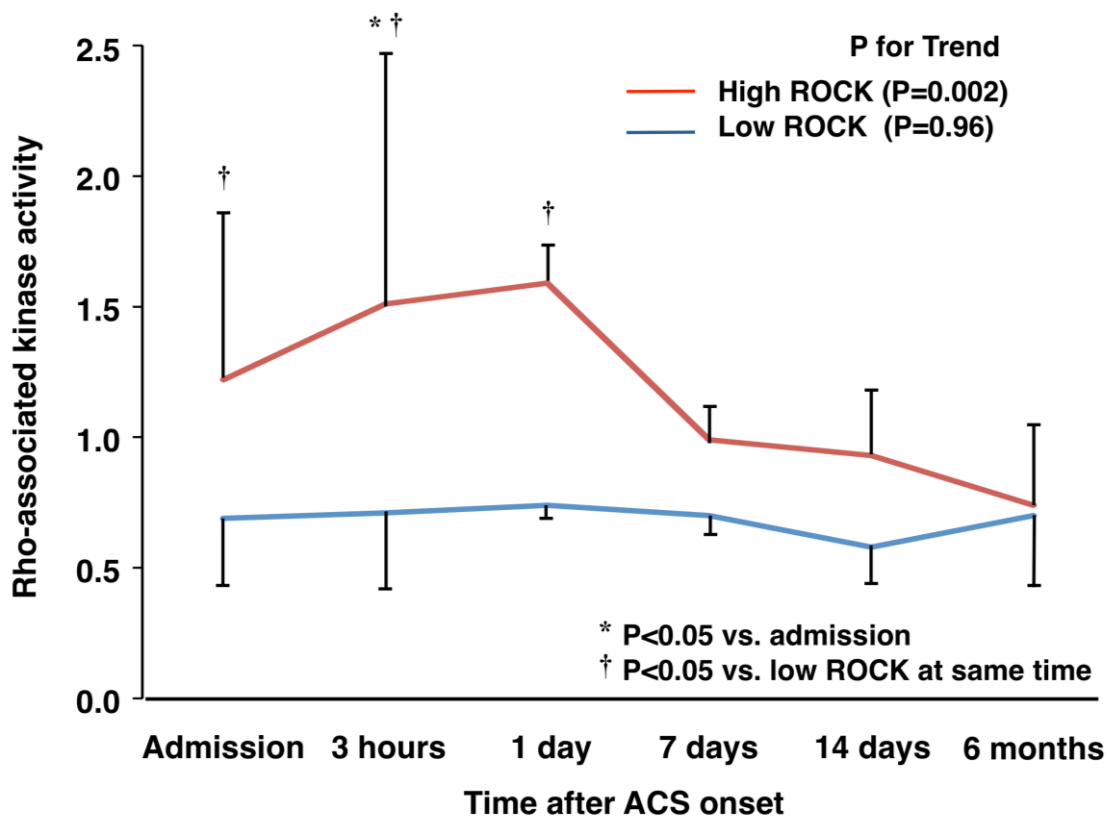

**Figure S4.** Time-course graphs of the actual Rho-associated kinase (ROCK) activity values in the low and high groups.



Figure S5

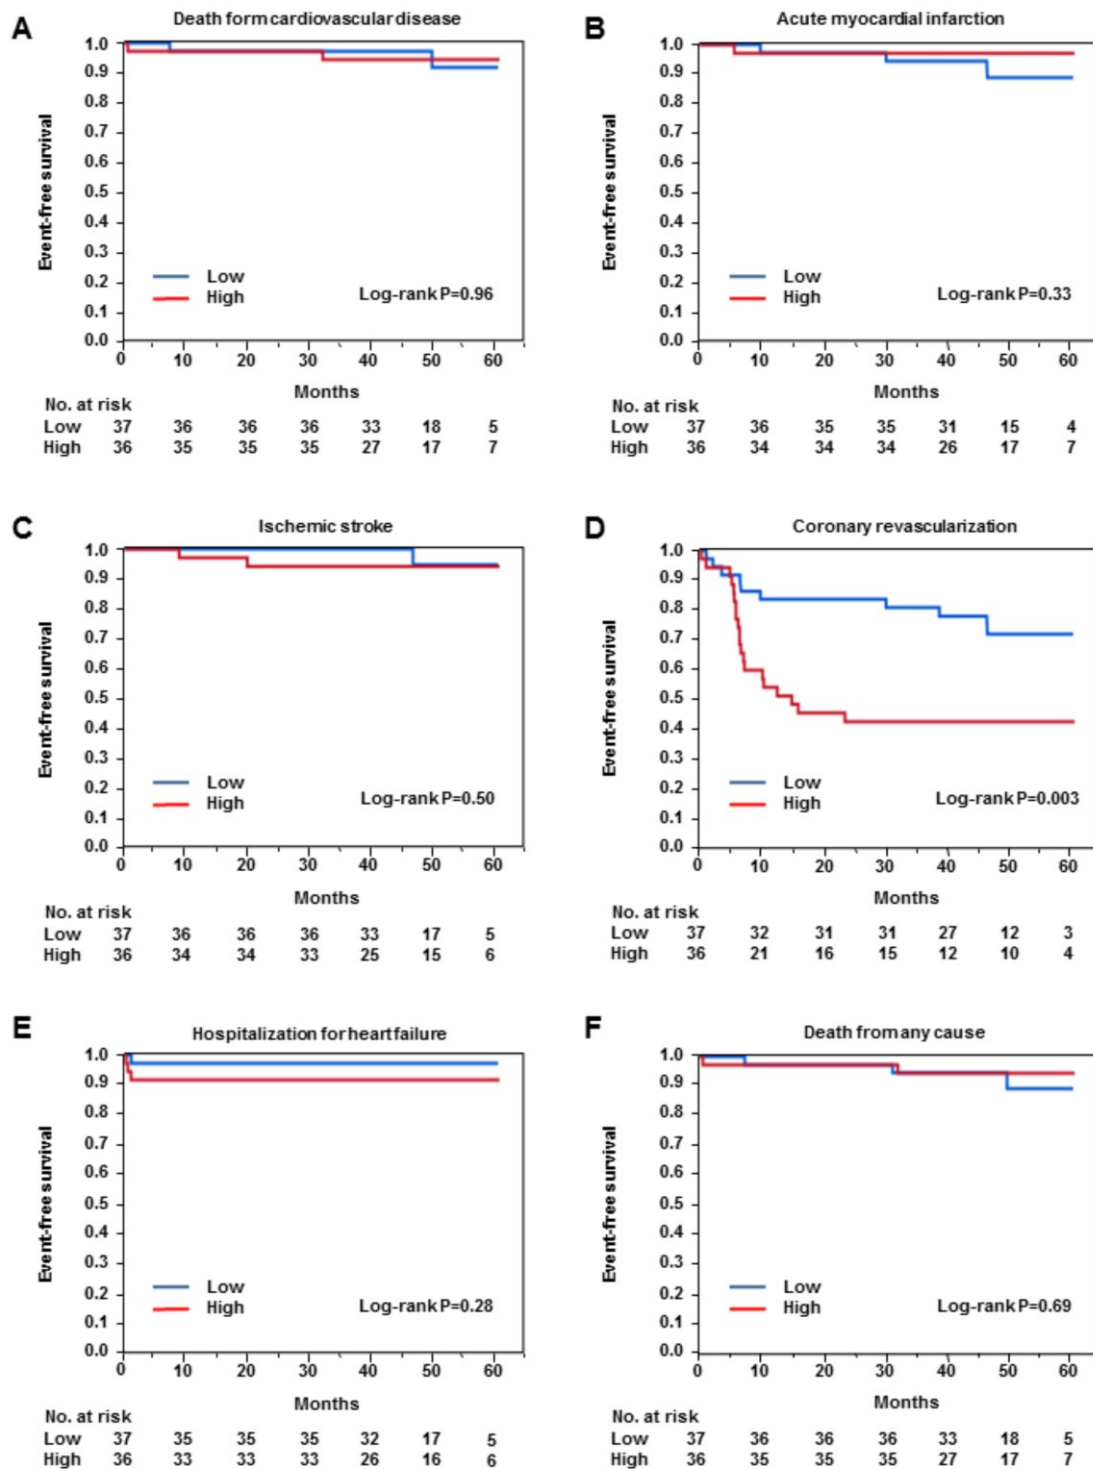

**Figure S5.** Kaplan-Meier curves of cumulative event-free survival of death from cardiovascular causes (panel A), acute myocardial infraction (panel B), ischemic stroke (panel C), coronary revascularization (panel D), hospitalization for heart failure (panel E), and death from any cause (panel F), according to the median value of maximum Rho-associated kinase activity. Low indicates maximum Rho-associated kinase activity  $<1.14$ , and high indicates maximum Rho-associated kinase activity  $\geq 1.14$ .

---

Figure S6

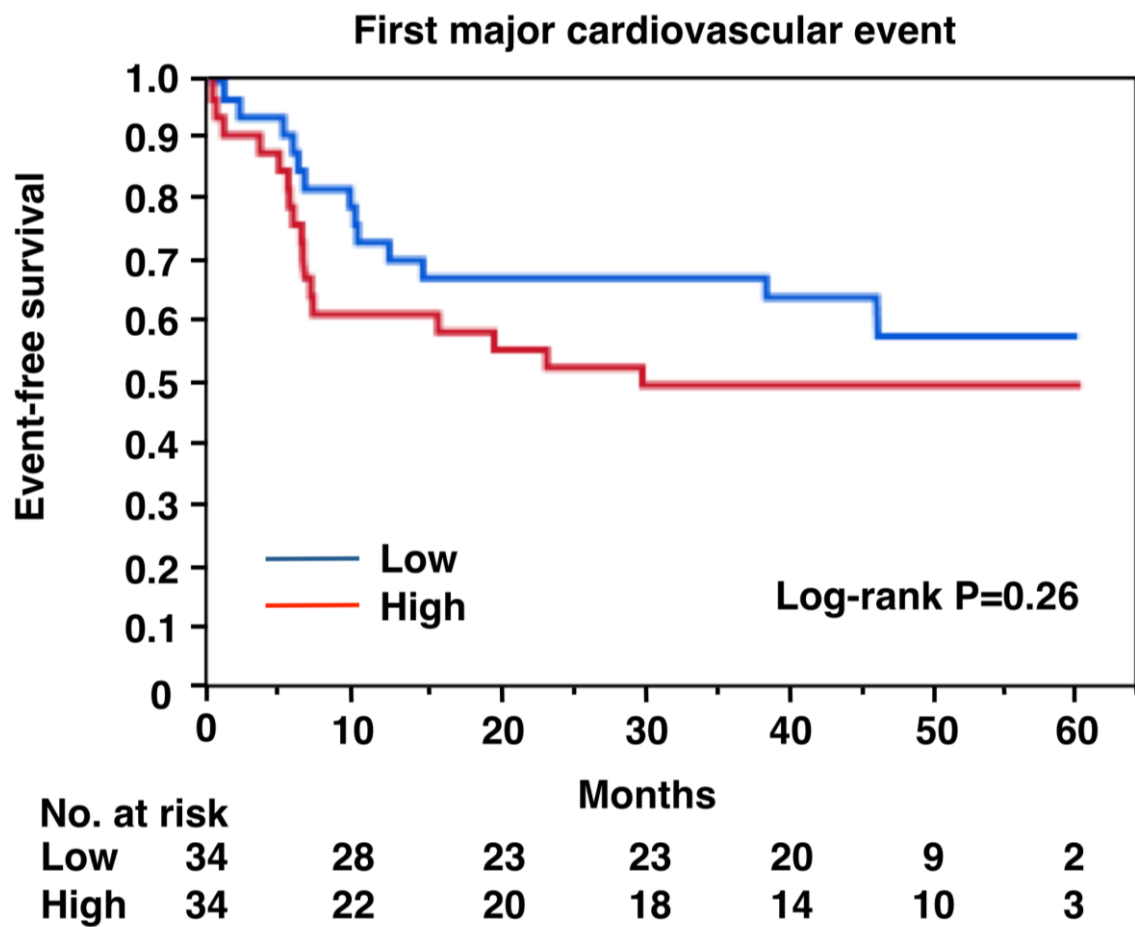

**Figure S6.** Kaplan-Meier curves of cumulative event-free survival of major cardiovascular events (death from cardiovascular causes, myocardial infarction, ischemic stroke, and coronary revascularization), according to the median value of the peak level of serum creatine kinase. Low indicates median value of the peak serum creatine kinase level of <1474, and high indicates median value of the peak serum creatine kinase level of  $\geq 1474$ .

Figure S7

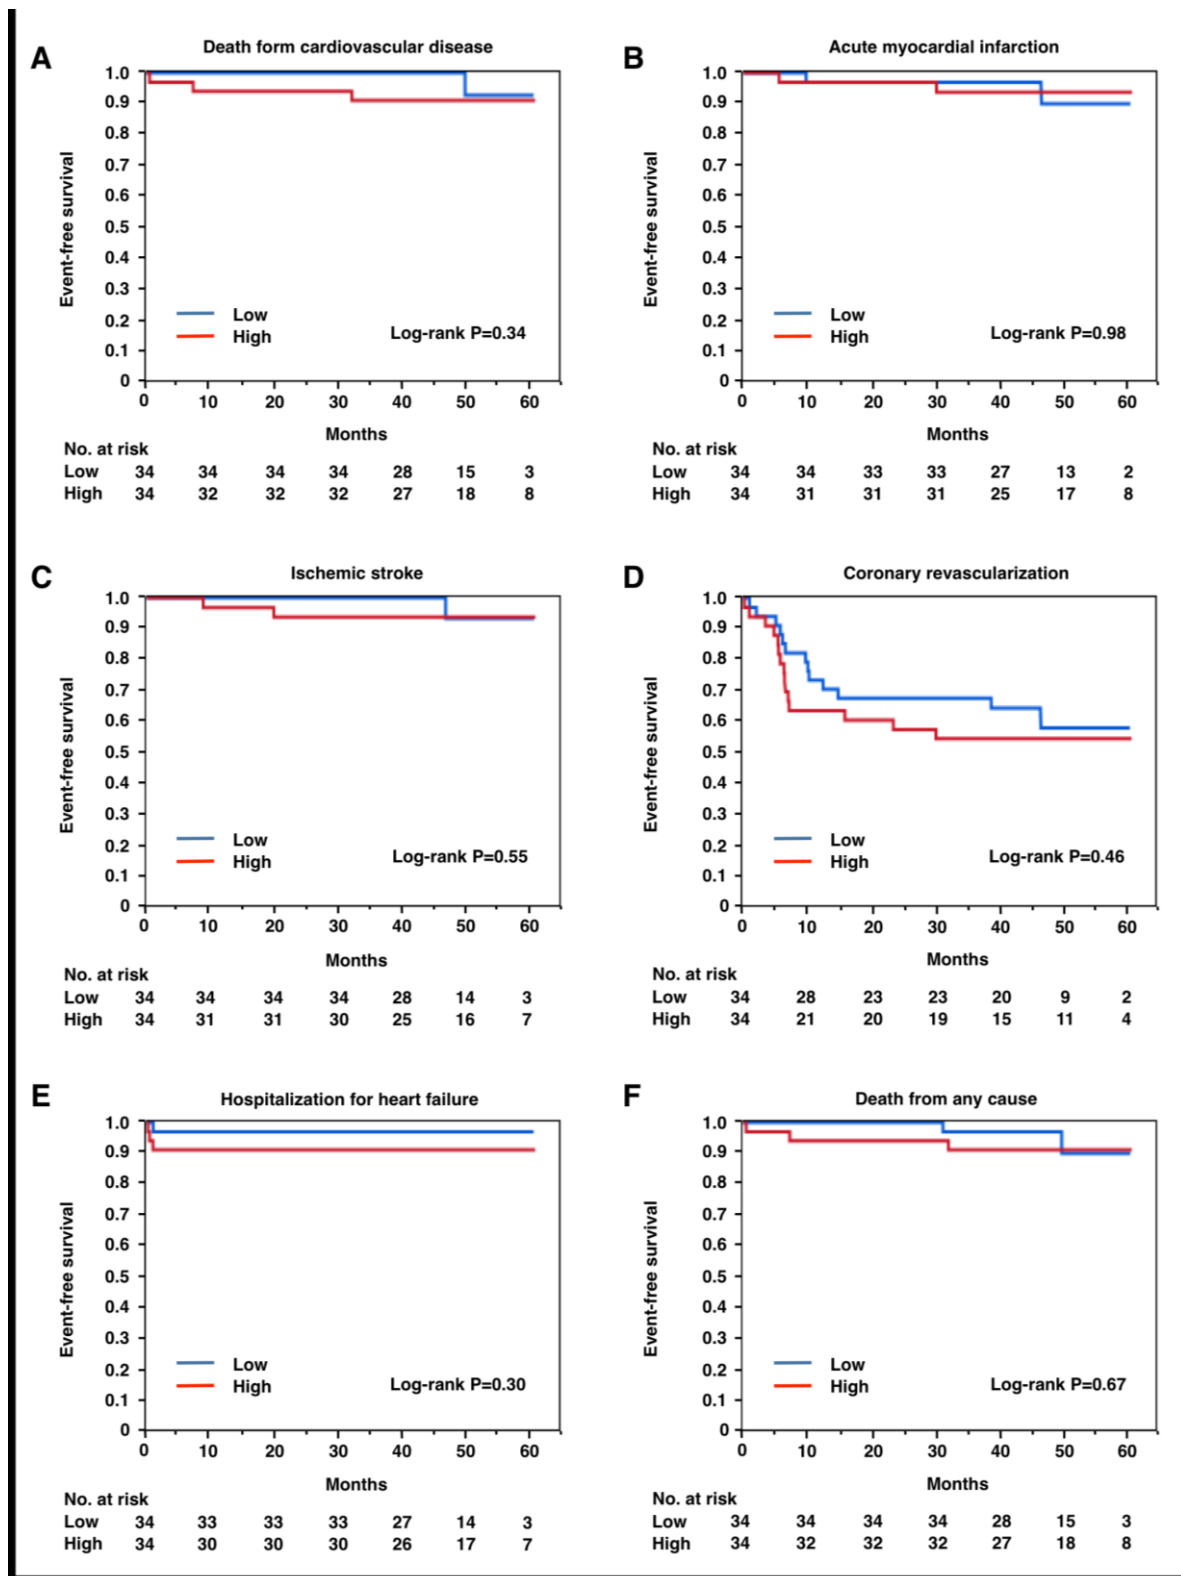

**Figure S7.** Kaplan-Meier curves of cumulative event-free survival of death from cardiovascular causes (panel A), acute myocardial infraction (panel B), ischemic stroke (panel C), coronary revascularization (panel D), hospitalization for heart failure (panel E), and death from any cause (panel F), according to the median value of the peak level of serum creatine kinase. Low indicates median value of the peak serum creatine kinase level of <1474, and high indicates median value of the peak serum creatine kinase level of  $\geq 1474$ .

---

Figure S8

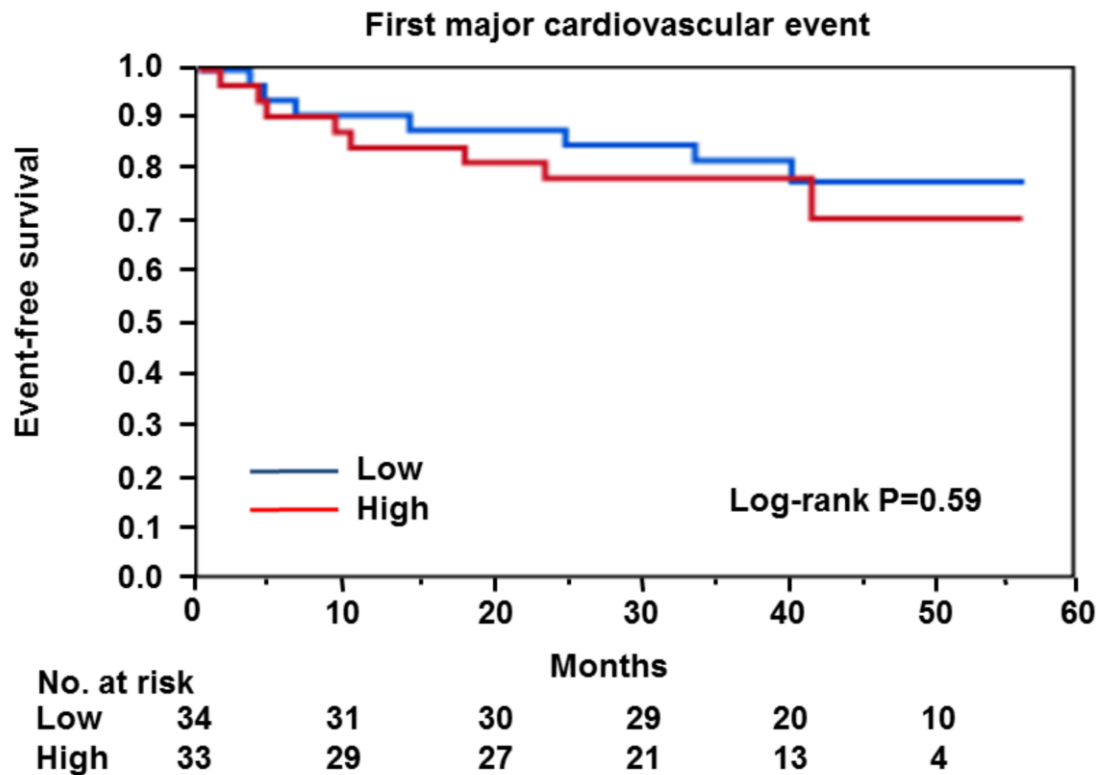

**Figure S8.** Kaplan-Meier curves of cumulative event-free survival of major cardiovascular events (death from cardiovascular causes, myocardial infarction, ischemic stroke, and coronary revascularization), according to the median value of Rho-associated kinase activity evaluated at 6 months after acute myocardial infarction onset. Low indicates maximum Rho-associated kinase activity  $<0.70$ , and high indicates maximum Rho-associated kinase activity  $\geq 0.70$

Figure S9

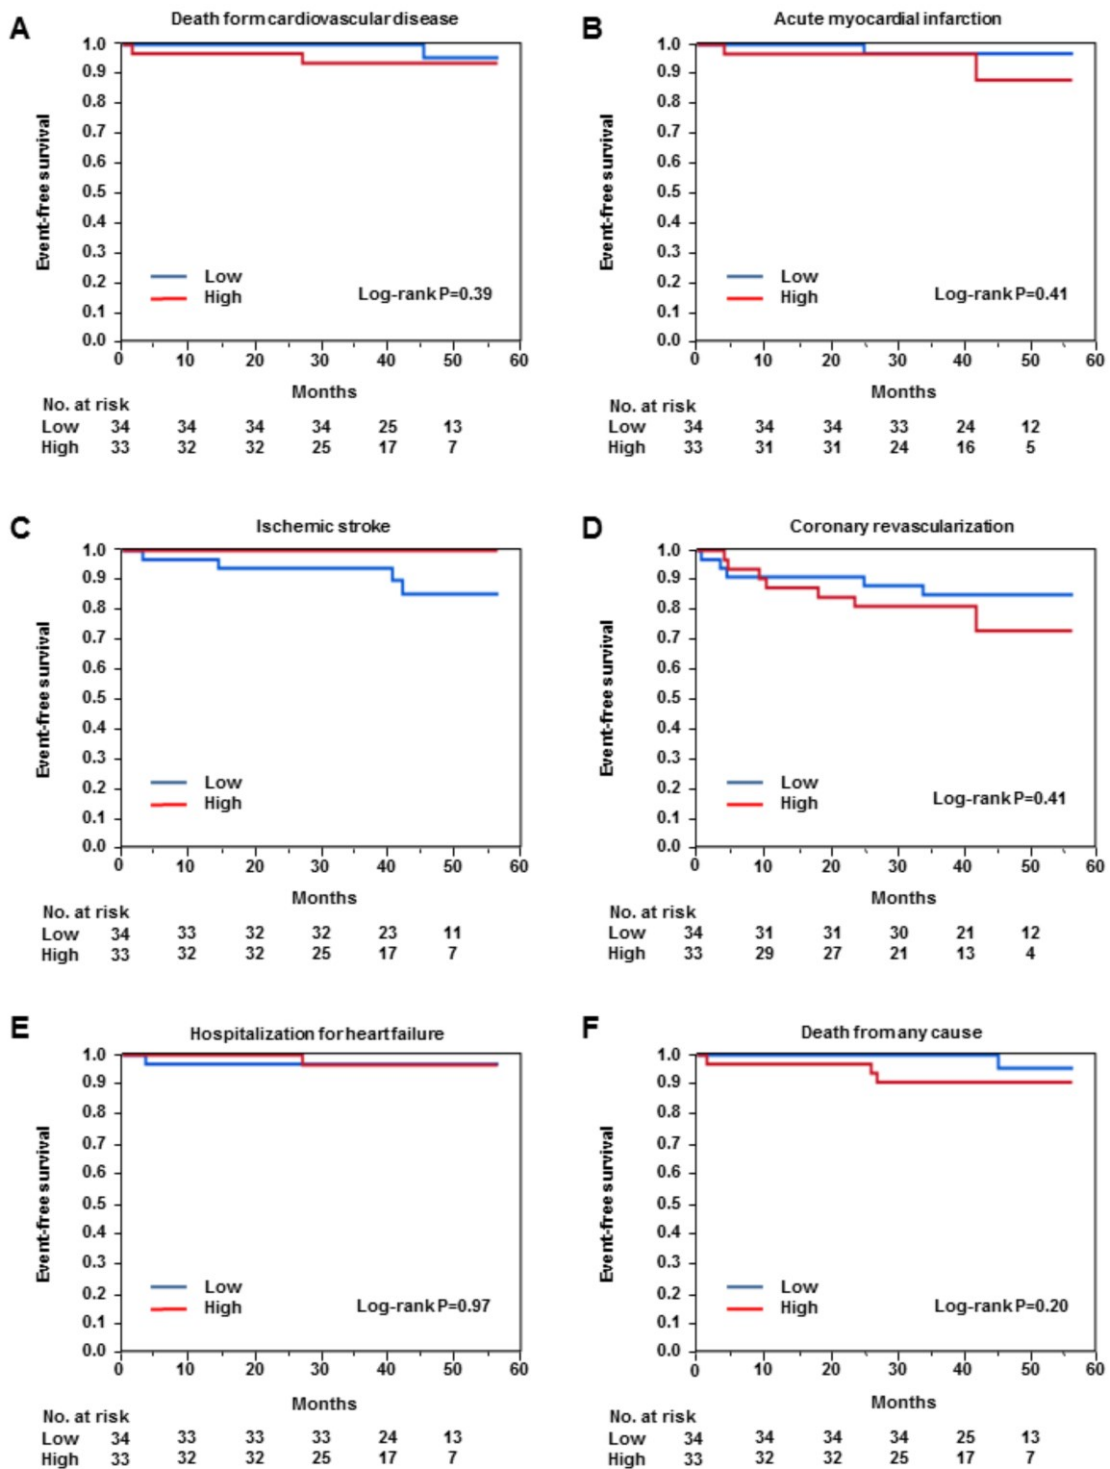

**Figure S9.** Kaplan-Meier curves of cumulative event-free survival of death from cardiovascular causes (panel A), acute myocardial infarction (panel B), ischemic stroke (panel C), coronary revascularization (panel D), hospitalization for heart failure (panel E), and death from any cause (panel F), according to the median value of Rho-associated kinase activity evaluated at 6 months after acute myocardial infarction onset. Low indicates maximum Rho-associated kinase activity  $<0.70$ , and high indicates maximum Rho-associated kinase activity  $\geq 0.70$ .

---
